# Supplementary material for: Characterization of NucPNP and NucV involved in the early steps of nucleocidin biosynthesis in Streptomyces calvus
Source: Royal Society of Chemistry journal article supplement (doi:10.1039/d0ra10878b), 2021-01-01
Supplement: d0ra10878b1.pdf [file d0ra10878b1.pdf]

## Characterization of NucPNP and NucV Involved in the Early Steps of Nucleocidin Biosynthesis in *Streptomyces calvus*

### Supporting Information

Utumporn Ngivprom,<sup>‡a</sup> Surayut Kluaiphanngam,<sup>‡a</sup> Wenjuan Ji,<sup>c</sup> Siriwalee Siriwibool,<sup>a</sup> Anyanee Kamkaew,<sup>a</sup> James R. Ketudat Cairns,<sup>a,b</sup> Qi Zhang,<sup>c\*</sup> and Rung-Yi Lai<sup>a,b\*</sup>

<sup>a</sup> School of Chemistry, Institute of Science, Suranaree University of Technology, Nakhon Ratchasima, 30000 Thailand

<sup>b</sup> Center for Biomolecular Structure, Function and Application, Suranaree University of Technology, Nakhon Ratchasima, 30000 Thailand

<sup>c</sup> Department of Chemistry, Fudan University, Shanghai, 200433 China

<sup>‡</sup> These authors contributed equally to this article.

## MBP-NucPNP overexpression and purification

Six milliliters of overnight culture of *E. coli* SHuffle T7 Express *lysY* containing pET28-MBP-NucPNP was inoculated into 1 L cultures in Luria-Bertani broth (LB) with the final concentration of 50 µg/mL kanamycin. The culture was shaken at 200 rpm and 30 °C until OD<sub>600</sub> reached about 0.6. The protein expression was induced by adding Isopropyl-β-D-1-thiogalactopyranoside (IPTG) with the final concentration of 200 µM. The culture mixture was shaken for an additional 16 hours at 200 rpm and 20 °C. The cells were spun down by centrifugation at 7,000 rpm and 4 °C for 20 minutes. The cells were resuspended in the lysis buffer (20 mM Tris-HCl, 200 mM NaCl, 1 mM EDTA, pH 7.4). The cells were lysed by sonication (1.5 s cycle, 50 % duty), followed by the centrifugation at 12,000 rpm and 4 °C for 40 minutes. The resulting cell lysate was clarified by centrifugation and the proteins were purified by amylose resin (New England Biolabs) following the manufacturer's instructions. After elution, the protein was desalted using a 10-DG column (BioRad) pre-equilibrated with 100 mM Tris-HCl buffer, 30% glycerol, pH 7.5. The purified protein was stored in aliquots at -80 °C.

## Overexpression and purification of NucV, ScAPRT, and EcAPRT

Six milliliters of overnight culture of *E. coli* BL21(DE3) containing pET28-NucV, pET28-ScAPRT or pET28-EcAPRT was inoculated into 1 L cultures in Luria-Bertani broth (LB) with the final concentration of 50 µg/mL kanamycin. The culture was shaken at 200 rpm and 37 °C until OD<sub>600</sub> reached about 0.6. The protein expression was induced by adding Isopropyl-β-D-1-thiogalactopyranoside (IPTG) with the final concentration of 200 µM. The culture mixture was shaken for an additional 16 hours at 200 rpm and 20 °C. The cells were spun down by centrifugation at 7,000 rpm and 4 °C for 20 minutes. The cells were resuspended in the lysis buffer (300 mM NaCl, 50 mM NaH<sub>2</sub>PO<sub>4</sub>, and 10 mM Imidazole). The cells were lysed by sonication (1.5 s cycle, 50 % duty), followed by the centrifugation at 12,000 rpm and 4 °C for 40 minutes. The resulting cell lysate was clarified by centrifugation and the proteins were purified on a Ni-NTA column (QIAGEN) following the manufacturer's instructions. After elution, the protein was desalted using a 10-DG column (BioRad) pre-equilibrated with 100 mM Tris-HCl buffer, 30% glycerol, pH 7.5. The purified protein was stored in aliquots at -80 °C.

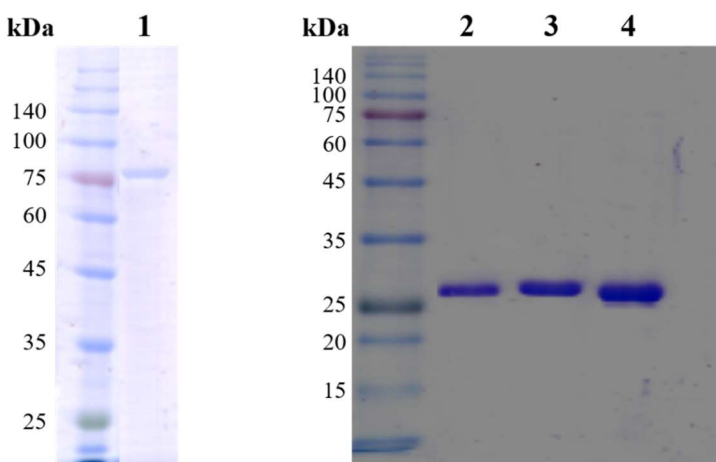

**Figure S1.** The SDS-PAGE analysis of MBP-NucPNP (#1), NucV (#2), ScAPRT (#3), and EcAPRT (#4).

### HPLC condition for the analysis of assays

The following linear gradient, at a flow rate of 1 mL/min, on a ZORBAX Eclipse XDB-C18 (4.6 mm x 150 mm, 5 µm ID) was used: solvent A is 50 mM potassium phosphate (pH 6.6), solvent B is water, solvent C is methanol; 0 min: 100% A; 5 min: 90% A, 10% B; 10 min, 60% A, 25% B, 15% C; 12 min: 60% A, 25% B, 15% C; 14 min: 10% A, 30% B, 60% C; 16 min: 10% A, 30% B, 60% C; 19 min: 100% A; 24 min: 100% A.

### The amino acid sequence of MBP-NucPNP (the underlined segment is NucPNP)

MGSSHHHHHSSGLVPRGSHMASGKIEEGKLVWINGDKGYNGLAEVGKKFEKDTGIKVTVEHPDKLEEKFPQVAAT  
GDGPDIIFWAHDRFGGYAQSGLLAEITPKAFQDKLYPFTWDAVRYNGKLIAYPIAVEALS LIYKDLLPNPPKTWEEIP  
ALDKELKAKGKSALMFNLQEPYFTWPLIAADGGYAFKYENGYDIKDVGVNAGAKAGLTFVLVLIKNKHMNADTDYS  
IAEAAFNKGETAMTINGPWAWSNIDTSKVNYGVTLPFTKGGQPSKPFVGVLSAGINAASPNKELAKEFLENYLLTDEGL  
EAVNKDKPLGAVALKSYEEELAKDPRIAATMENAQKGEIMPNIQMSAFWYAVRTAVINAASGRQTVDEALKDAQTRI  
TKGENLYFQGGGMDLPRADIGVIGGSGLYSFLDDVTEVPVTTTPYGPPSDALLVGEYAGRTIAFLPRHGRSHSVP  
PHRIN  
YRANLWALRSVGVRRVLAPCAVGSLSDAELGPGTLVVPDQVIDRTYGRENTYFDGLPREDGTFPPVAHAPMADPYCST  
GRETVIATAREQGWPPHPEGTLVVIQGRFSTRAESLWHRAAGGTVVGMTGQPEAALARELGLCYTSIALVTDLDAGA  
ETGEGVTHEEVLAVFRQNIDRLRPLLTATIKNLPGEDACACPDAPDAEHV

### The amino acid sequence of NucV fusion protein (the underlined segment is NucV)

MSSHHHHHSSGENLYFQGGGMDTAPHQPPAADLGQPAAGPGGHLAGHIRDVVDHPRPGVTFKDITPLLADPGAFA  
DTVDILSAMCTRLGATRIAGLEARGFLLAAPVALRCGAGCVPVRKAGKLPGETFSRAYELEYGTATLEIQRDAFRPEDRV  
VVVDDVLATGGTAEAAIELVHSTGARVTGVVLMELTFLPGRERLERLVKSDCVQAAIAV

### The amino acid sequence of ScAPRT fusion protein (the underlined segment is ScAPRT)

MSSHHHHHSSGENLYFQGGGMDTELSTLLSRIRDVADHPEPGVMFKDITPLLADPAAFSALSDALADIARDTGAT  
KVVGLEARGFILGAPAAVRAGVGFIPVRKAGKLPGATLSQAYDLEYGSAEIEVHAEDLSAGDRVLVDDVLATGGTAE  
SLQLIRRAGAQAVALVLMELGFLGGRARLEPALAGAPLKALLTI

### The amino acid sequence of EcAPRT fusion protein (the underlined segment is EcAPRT)

MSSHHHHHSSGENLYFQGGGMDATAQQLEYLKNISIKSIQDYPKPGILFRDVTSLMEDPKAYALSIDLLVERYKNAGITK  
VVGTEARGFLFGAPVALGLGVGFVPRKPGKLPRETISETYDLEYGTDQLEIHVDAIKPGDKVLVDDLLATGGTIEATVK  
LIRRLGGEVADAAFIINLFDLGGEQRLEKQGITSYSLVPPFGH

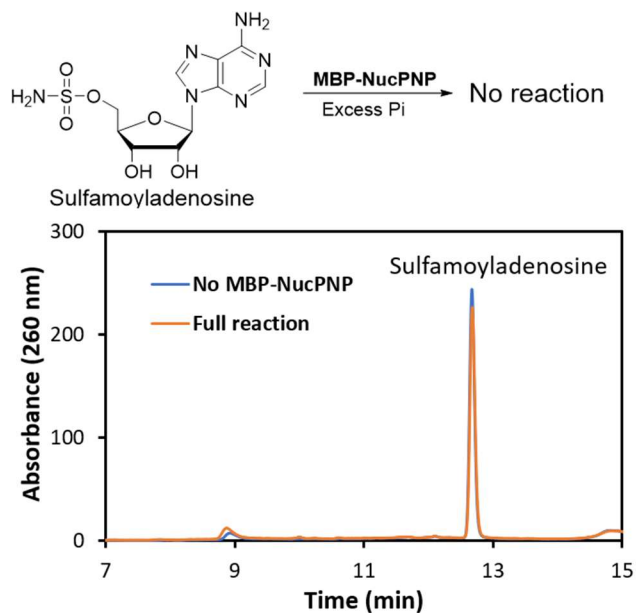

**Figure S2.** HPLC analysis of sulfamoyladenosine assayed with MBP-NucPNP to show no reaction.

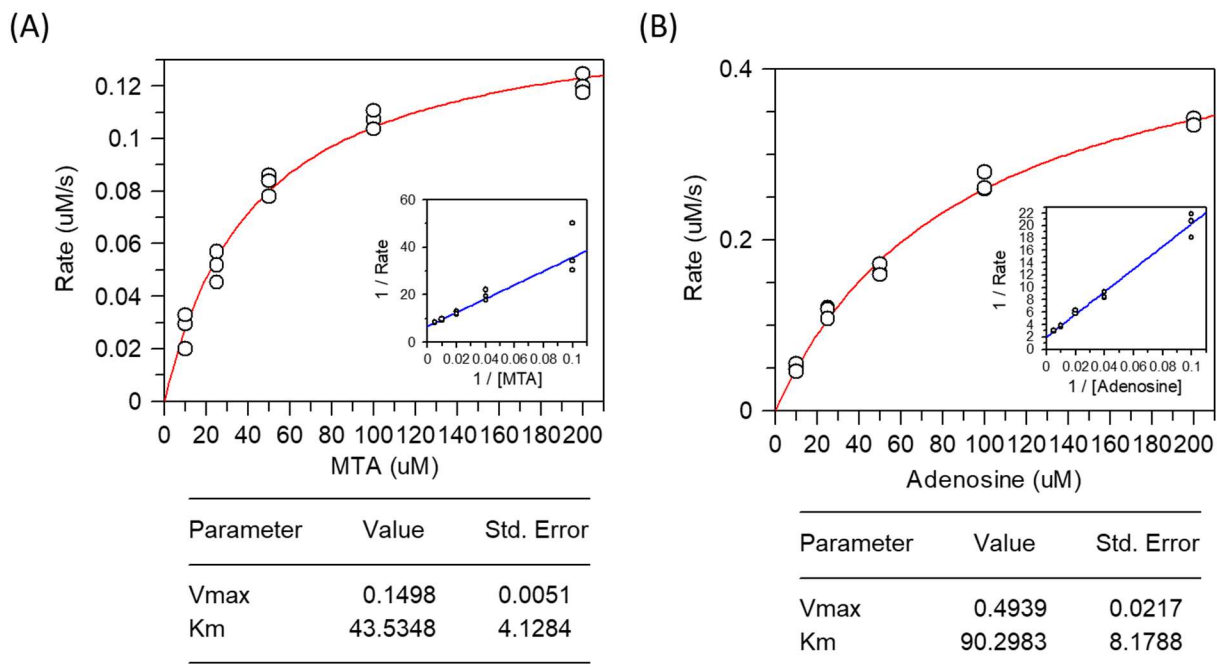

**Figure S3.** The Michaelis-Menten curves of phosphorylation of MTA (A) or adenosine (B) catalyzed by MBP-NucPNP.

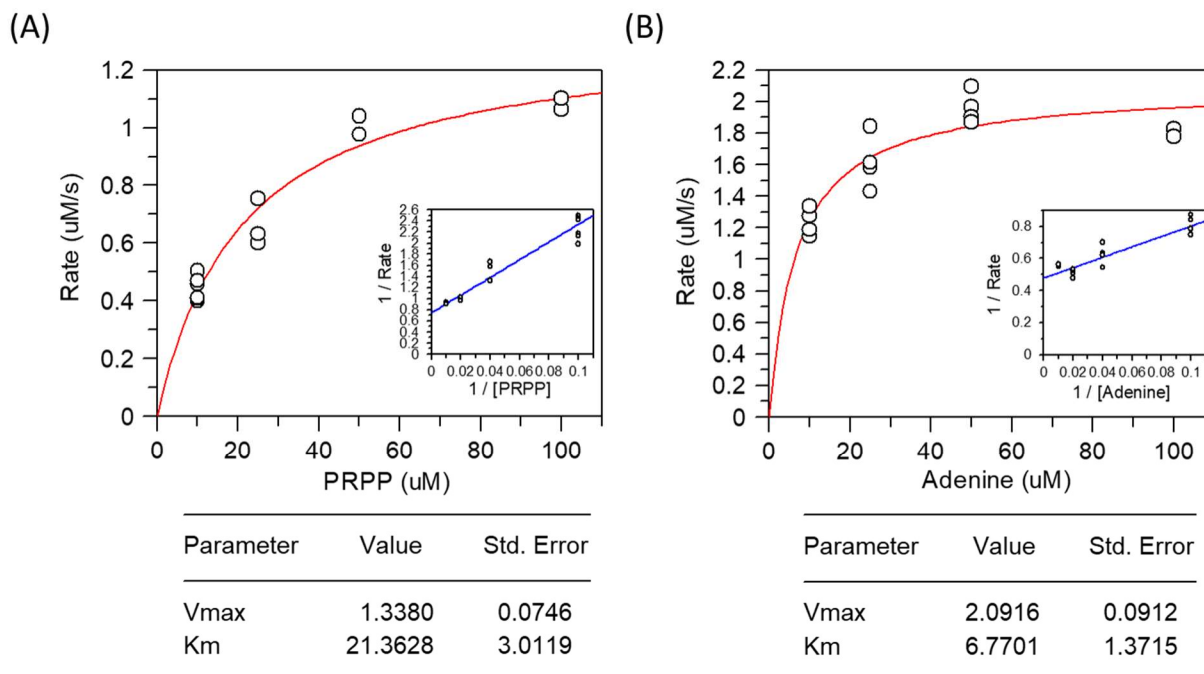

**Figure S4.** The Michaelis-Menten curves of AMP formation catalyzed by NucV.

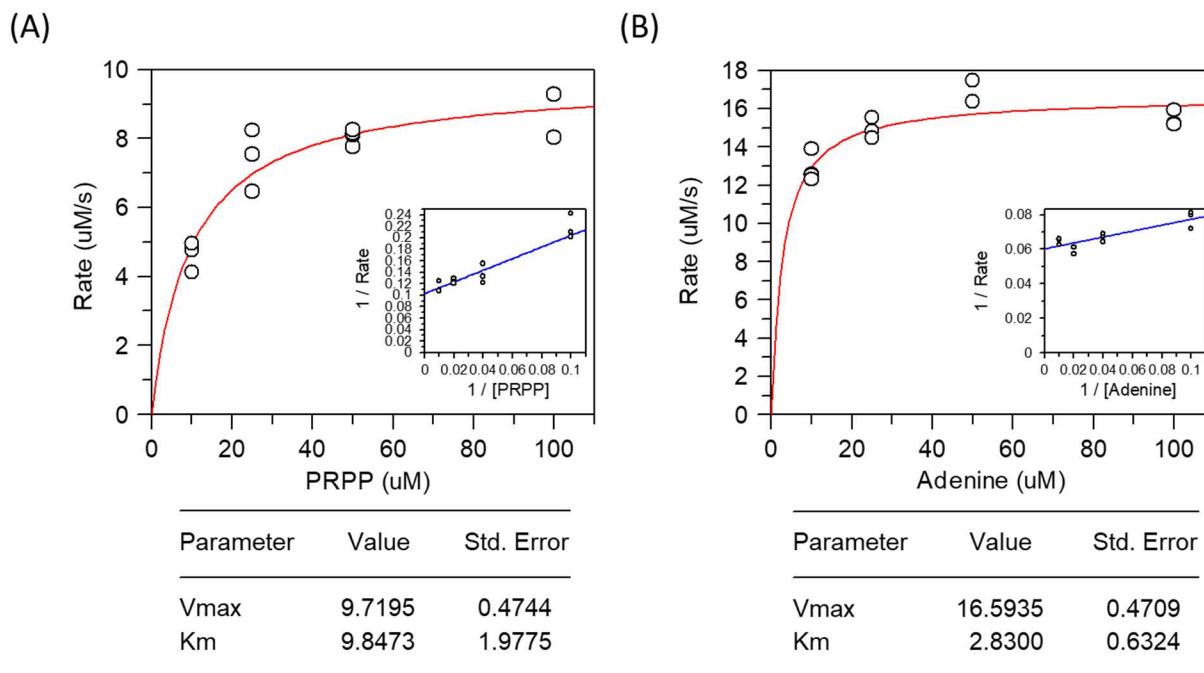

**Figure S5.** The Michaelis-Menten curves of AMP formation catalyzed by ScAPRT.

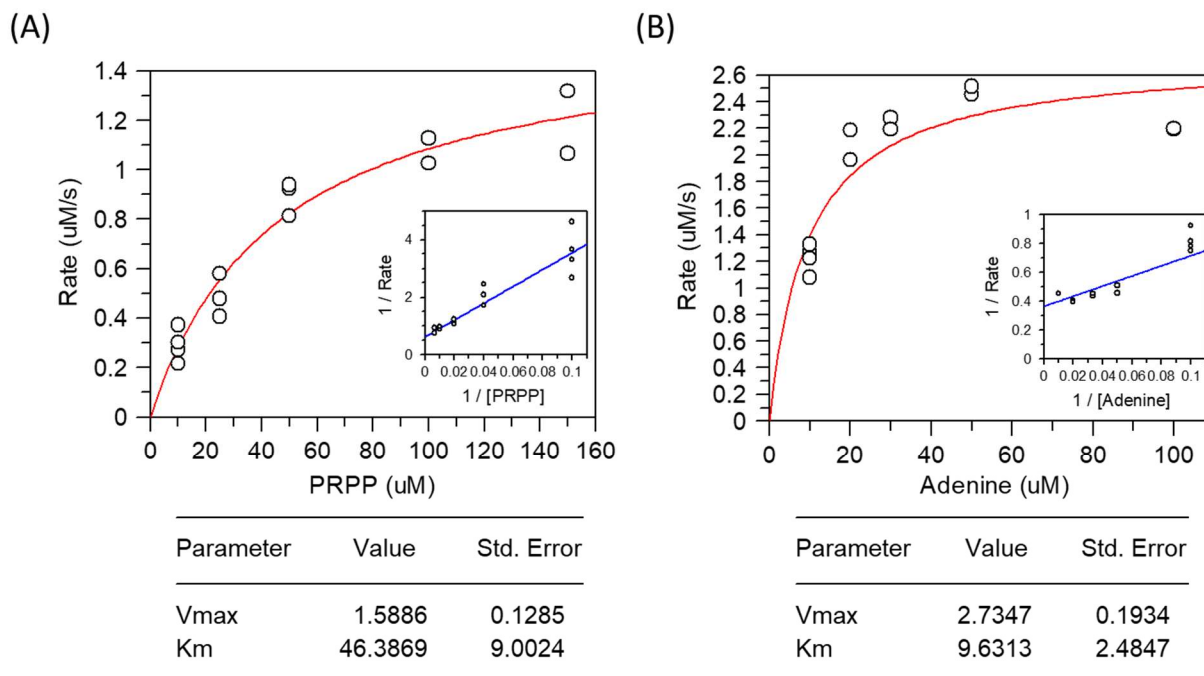

**Figure S6.** The Michaelis-Menten curves of AMP formation catalyzed by *EcAPRT*.

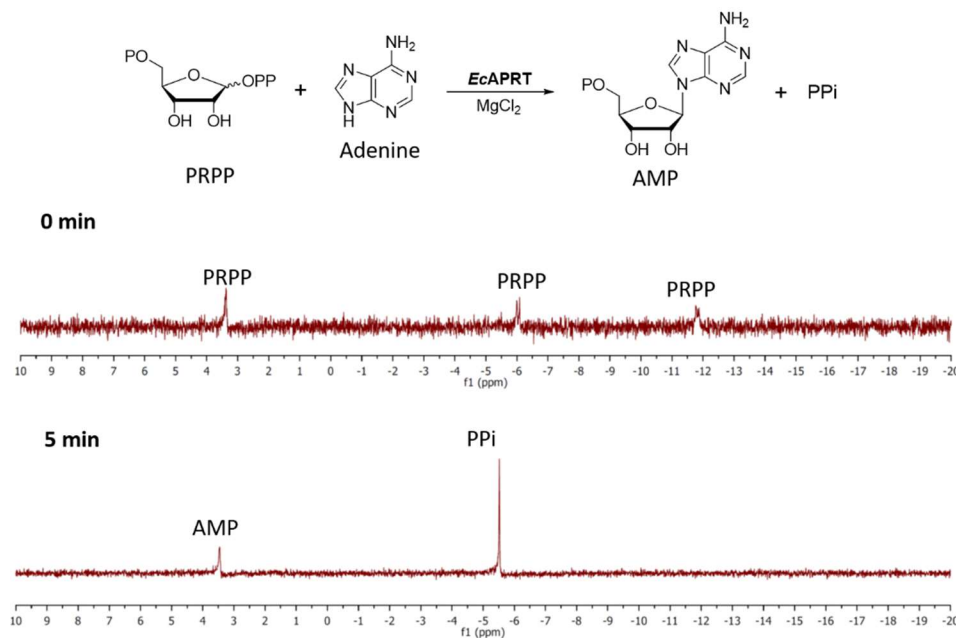

**Figure S7.**  $^{31}\text{P}$ -NMR analysis of *EcAPRT* catalyzing AMP formation. The reaction rate was similar with that of *ScAPRT* (Fig. 5B).

**Table S1.** The increase in mRNA after the complement with a functional *bldA* reported by Zechel's group<sup>1</sup>

| Gene                               | Predicted function                | Fold of mRNA change* |
|------------------------------------|-----------------------------------|----------------------|
| <i>nucV</i>                        | Adenine phosphoribosyltransferase | 110                  |
| <i>nucPNP</i><br>( <i>orf206</i> ) | Purine nucleoside phosphorylase   | 151                  |
| <i>nucJ</i>                        | Radical SAM enzyme                | 85                   |
| <i>nucGS</i>                       | Glycosyltransferase               | 12                   |

\* mRNA increasing level with a functional *bldA* to restore nucleocidin production.

**Table S2.** The kinetic constants of *EcAPRT* for PRPP and adenine<sup>a</sup>

| Substrate | $k_{cat}$<br>( $s^{-1}$ ) | $K_m$<br>( $\mu M$ ) | $k_{cat}/K_m$<br>( $\mu M^{-1} s^{-1}$ ) |
|-----------|---------------------------|----------------------|------------------------------------------|
| PRPP      | $15.9 \pm 1.3$            | $46.4 \pm 9.0$       | 0.34                                     |
| Adenine   | $27.3 \pm 1.9$            | $9.6 \pm 2.5$        | 2.84                                     |

<sup>a</sup> The  $k_{cat}$ ,  $K_m$ , and  $k_{cat}/K_m$  were determined at the fixed concentration of 500  $\mu M$  adenine with varied PRPP or 500  $\mu M$  PRPP with varied adenine catalyzed by 0.1  $\mu M$  of *EcAPRT*.

## Synthesis of sulfamoyladosine (4)

High resolution mass spectrometry (HR-MS) analysis was performed using a Q-Exactive<sup>TM</sup> Focus Hybrid Quadrupole-Orbitrap Mass Spectrometer (Thermo Fisher) equipped with a Dionex Ultimate 3000 HPLC system (Thermo Fisher). The <sup>1</sup>H-NMR spectra were obtained on a Bruker 400 MHz NMR Fourier transform spectrometer. NMR spectra was recorded deuterated chloroform (CDCl<sub>3</sub>) with residual chloroform ( $\delta = 7.26$  ppm for <sup>1</sup>H-NMR) and TMS ( $\delta = 0$  ppm for <sup>1</sup>H-NMR) as the standard.

The reagent grade chemicals were purchased from Sigma or Energy Chemical without further purification. Purification of the product was carried out by preparation TLC (Thin layer chromatography) coated with GF254 silica gel and CMC, Carboxymethylcellulose sodium). For TLC analysis, precoated plates (HSGF254 silica gel) were used.

## 1. Preparation of 2',3'-*O*-isopropylideneadenosine (2)

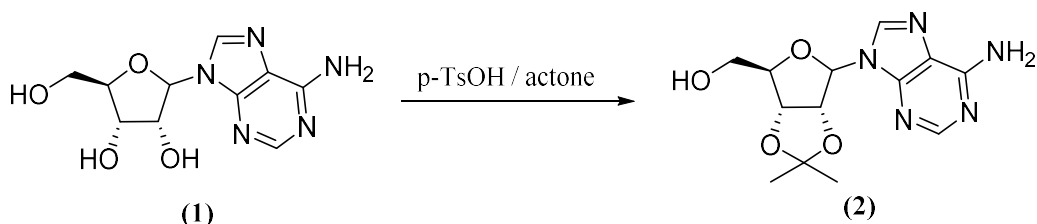

The 2',3'-*O*-isopropylideneadenosine (**2**) was prepared according to the procedure reported previously<sup>2</sup>. To a suspension of adenosine (**1**) (2.67 g, 10.0 mmol) in dry acetone (500 mL) was added *p*-TsOH monohydrate (19.0 g, 100.0 mmol) in one portion. The mixture was stirred at room temperature for 3 hours, and ice-cold saturated NaHCO<sub>3</sub> solution was added to the reaction with stirring over 5 minutes to adjust to pH 8.0. The volatiles were removed under reduced pressure and the remaining aqueous layer was extracted three times with 300 mL of ethyl acetate. The combined ethyl acetate layers were washed with brine and dried over anhydrous sodium sulfate. The ethyl acetate was removed under reduced pressure, and the product (**2**) was obtained as a white solid (93%): HR-ESI-MS ([M+H]<sup>+</sup>): 308.1359 (calculated), 308.1402 (found). <sup>1</sup>H-NMR (400 MHz, CD<sub>3</sub>OD): δ = 1.40 (s, 3H), 1.67 (s, 3H), 3.82 (d, 1H, *J* = 12.0 Hz), 4.00 (d, 1H, *J* = 12.0 Hz), 4.57 (s, 1H), 5.13 (d, 1H, *J* = 4.0 Hz), 5.23 (t, 1H, *J* = 8.0 Hz), 5.88~5.89 (m, 2H), 6.47 (brs, 2H), 7.88 (s, 1H), 8.35 (s, 1H).

## 2. Preparation of 2',3'-*O*-isopropylideneadenosine-6'-*O*-amino sulfamate (3)

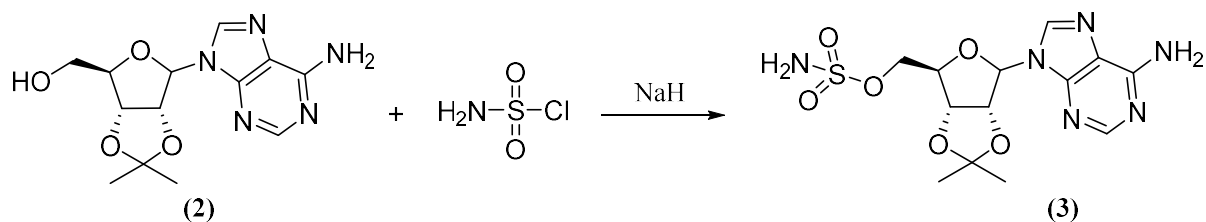

The 2',3'-*O*-isopropylideneadenosine-6'-*O*-amino sulfamate (**3**) was prepared according to the procedure reported previously with some modifications<sup>3</sup>. Under an atmosphere of nitrogen, the 2',3'-*O*-isopropylideneadenosine (**2**) (307mg, 1 mmol, 1.0 eq) was dissolved in 1.5 mL THF and 1.5 mL NMP. The resulting solution was cooled in an ice-water bath and 60% NaH (78mg, 1.5 mmol, 1.5 eq) was added. The reaction mixture was stirred for 30 minutes with continuous cooling. Next, the sulfamoyl chloride (172.5 mg, 1.5 eq in 1 mL NMP) was added dropwise, the reaction mixture was allowed to warm to room temperature and then stirred for 2 hours. Once the reaction was complete, the reaction mixture was once again cooled in an ice bath and any residual NaH was quenched through the dropwise addition of methanol. The reaction mixture was then concentrated in a rotary evaporator. The resultant residue was dissolved in water and extracted three times with 30 mL of ethyl acetate. The combined ethyl acetate layers were washed with brine and dried over anhydrous sodium sulfate. The ethyl acetate was removed in a rotary evaporator, and the crude product yellow oil (200mg) was obtained. HR-ESI-MS ([M+H]<sup>+</sup>): 387.1087 (calculated), 387.1067 (found). The yellow oil was not purified and used directly in the next step.



### 3. Preparation of sulfamoyladenosine (**4**)

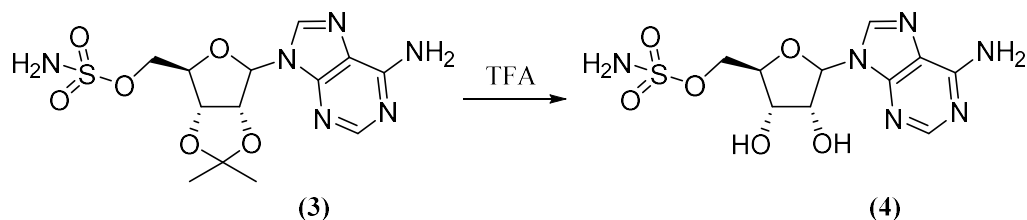

The adenosine-6'-*O*-amino sulfamate (**4**) was prepared according to the procedure reported previously with some minor modifications<sup>3</sup>. To a round-bottom flask containing the crude product of sulfamoyladenosine (**4**) (200 mg yellow oil, 1.0 eq) was added TFA (8.0 ml) and distilled water (4.0 ml). The reaction mixture was stirred overnight at room temperature. The water and TFA were then removed using a rotary evaporator and the product was purified by silica gel chromatography with the mobile phase consisted of (CH<sub>2</sub>Cl<sub>2</sub>/MeOH/NH<sub>4</sub>OH (9/1/1)). 94.5 mg grey slurry was obtained. The product contained NH<sub>4</sub>OH as an impurity, and the amount ratio of NH<sub>4</sub>OH and the product is about 3:1 from the <sup>1</sup>H-NMR spectrum. HR-ESI-MS ([M+H]<sup>+</sup>): 347.0774 (calculated), 347.0764 (found). <sup>1</sup>H-NMR(DMSO-*d*<sub>6</sub>, 400MHz): $\delta$  = 4.10~4.29 (m, 3H), 4.61 (dd, 2H,  $J_1$  = 5.2 Hz,  $J_2$  = 5.2Hz), 5.45 (d, 1H,  $J$  = 5.6 Hz), 5.63 (d, 1H,  $J$  = 5.6 Hz), 5.92 (d, 1H,  $J$  = 5.2 Hz), 7.17 (brs, 2H), 7.31 (brs, 2H), 8.14 (s, 1H), 8.29 (s, 1H).

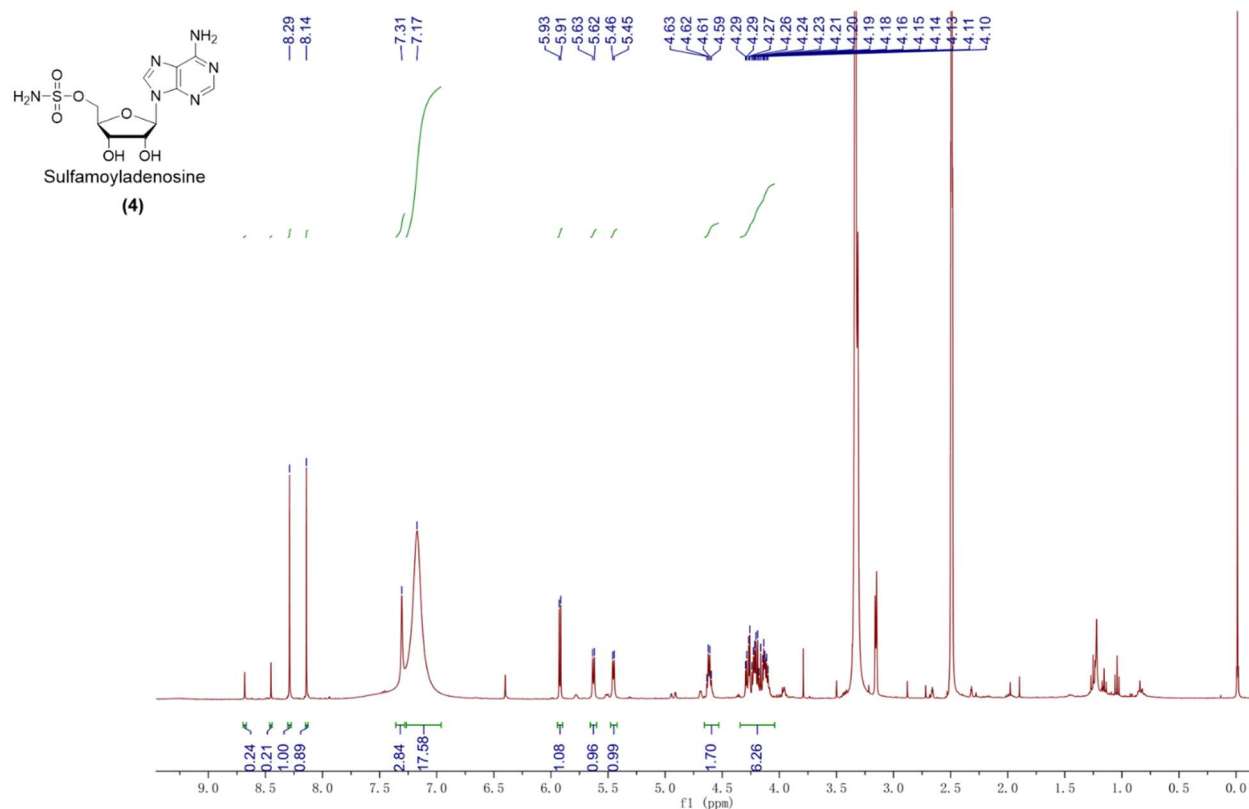

Figure S5. <sup>1</sup>H-NMR spectrum of sulfamoyladenosine (**4**).

## Reference

- 1 X. M. Zhu, S. Hackl, M. N. Thaker, L. Kalan, C. Weber, D. S. Urgast, E. M. Krupp, A. Brewer, S. Vanner, A. Szawiola, G. Yim, J. Feldmann, A. Bechthold, G. D. Wright and D. L. Zechel, *ChemBioChem*, 2015, **16**, 2498–2506.
- 2 W. Ji, X. Ji, Q. Zhang, D. Mandalapu, Z. Deng, W. Ding, P. Sun and Q. Zhang, *Angew. Chemie Int. Ed.*, 2020, **59**, 8880–8884.
- 3 J. L. Lukkarila, S. R. da Silva, M. Ali, V. M. Shahani, G. W. Xu, J. Berman, A. Roughton, S. Dhe-Paganon, A. D. Schimmer and P. T. Gunning, *ACS Med. Chem. Lett.*, 2011, **2**, 577–582.
